# Supplementary material for: What Happens When Donors Pull Out? Examining Differences in Motivation Between Health Workers Who Recently Had Performance-Based Financing (PBF) Withdrawn With Workers Who Never Received PBF in the Democratic Republic of Congo
Source: PubMed Central journal article supplement (PMC6885854; doi:10.15171/ijhpm.2019.55), 2019-07-13
Supplement: ijhpm-8-646-s001.pdf [file ijhpm-8-646-s001.pdf]

Supplementary file 1

Table S1. Dimensions and distribution of item scores overall and by PBF status

|                                     |                                                                                                       | Overall           | Non PBF           | Previous PBF      | Total number obs |
|-------------------------------------|-------------------------------------------------------------------------------------------------------|-------------------|-------------------|-------------------|------------------|
| Dimension                           | Item                                                                                                  | Mean, SD (median) | Mean, SD (median) | Mean, SD (median) |                  |
| Conscientiousness                   | <i>I am confident about my ability to handle my work</i>                                              | 4.21, 0.46 (4)    | 4.23, 0.50 (4)    | 4.14, 0.35 (4)    | 452              |
|                                     | <i>I effectively cope with any new challenges that occur in my work life</i>                          | 4.06, 0.50 (4)    | 4.09, (0.50) (4)  | 3.99, 0.50 (4)    | 452              |
|                                     | <i>At work you can always depend on me</i>                                                            | 4.13, 0.46 (4)    | 4.13, 0.46 (4)    | 4.06, 0.46 (4)    | 452              |
|                                     | <i>My work is always of high quality</i>                                                              | 4.02, 0.58 (4)    | 4.05, 0.57 (4)    | 3.93, 0.60 (4)    | 452              |
|                                     | <i>I am a hard worker</i>                                                                             | 4.15, 0.60 (4)    | 4.16, 0.56 (4)    | 4.10, 0.70 (4)    | 452              |
|                                     | <i>I always arrive on time to work</i>                                                                | 4.05, 0.66 (4)    | 4.07, 0.67 (4)    | 3.99, 0.63 (4)    | 452              |
|                                     | <i>I spend my time at work on work-related activities</i>                                             | 4.13, 0.41 (4)    | 4.15, 0.39 (4)    | 4.08, 0.46 (4)    | 452              |
|                                     | <i>I am careful not to make mistakes at work</i>                                                      | 4.18, 0.44 (4)    | 4.21, 0.47 (4)    | 4.12, 0.32 (4)    | 452              |
|                                     | <i>When I am not sure how to treat a patient's condition I look for information or ask for advice</i> | 4.12, 0.50 (4)    | 4.14, 0.52 (4)    | 4.08, 0.42 (4)    | 452              |
|                                     | <i>I do things which need to be done without being asked or told</i>                                  | 4.06, 0.57 (4)    | 4.09, 0.53 (4)    | 3.97, 0.67 (4)    | 452              |
| Pride                               | <i>This facility has a good reputation in the community</i>                                           | 4.12, 0.69 (4)    | 4.18, 0.67 (4)    | 3.95, 0.71 (4)    | 451              |
|                                     | <i>It is a source of pride to work here</i>                                                           | 3.92, 0.80 (4)    | 3.96, 0.79 (4)    | 3.80, 0.69 (4)    | 451              |
|                                     | <i>I feel I am doing something important in this work</i>                                             | 3.95, 0.72 (4)    | 4.00, 0.70 (4)    | 3.80, 0.76 (4)    | 451              |
|                                     | <i>The other workers are proud to deliver good care to patients</i>                                   | 4.08, 0.62 (4)    | 4.13, 0.62 (4)    | 3.95, 0.61 (4)    | 451              |
| Training                            | <i>How do you rate your opportunities to upgrade your skills and knowledge?</i>                       | 3.39, 1.10 (4)    | 3.51, 1.06 (4)    | 3.06, 1.13 (3)    | 452              |
|                                     | <i>How do you rate your ability to put into practice what you have learned from training?</i>         | 3.84, 0.86 (4)    | 3.95, 0.75 (4)    | 3.54, 1.06 (4)    | 452              |
|                                     | <i>How do you rate how you and your colleagues are chosen to attend training?</i>                     | 3.29, 1.05 (4)    | 3.38, 1.02 (4)    | 3.03, 1.09 (3)    | 452              |
|                                     | <i>I have received sufficient training to do my job well</i>                                          | 3.79, 0.96 (4)    | 3.83, 0.95 (4)    | 3.68, 1.00 (4)    | 451              |
| Tasks                               | <i>How do you rate the description of your job role and tasks?</i>                                    | 3.76, 0.85 (4)    | 3.75, 0.88 (4)    | 3.80, 0.75 (4)    | 453              |
|                                     | <i>How do you rate satisfaction with your workload?</i>                                               | 3.29, 1.03 (4)    | 3.19, 1.06 (4)    | 3.60, 0.87 (4)    | 453              |
|                                     | <i>How do you rate the division of work between you and your colleagues?</i>                          | 3.71, 0.79 (4)    | 3.68, 0.81 (4)    | 3.79, 0.71 (4)    | 443              |
|                                     | <i>How do you rate the division of work between caring for patients and other tasks?</i>              | 3.67, 0.81 (4)    | 3.59, 0.87 (4)    | 3.86, 0.57 (4)    | 453              |
|                                     | <i>How do you rate the variety of your tasks?</i>                                                     | 3.67, 0.81 (4)    | 3.64, 0.85 (4)    | 3.75, 0.67 (4)    | 453              |
| Availability of equipment /supplies | <i>How do you rate the availability of medicines in the health facility?</i>                          | 2.34, 1.17 (2)    | 2.59, 1.17 (2)    | 1.60, 0.81 (1)    | 453              |

|                         |                                                                                                                                           |                   |                   |                     |     |
|-------------------------|-------------------------------------------------------------------------------------------------------------------------------------------|-------------------|-------------------|---------------------|-----|
|                         | <i>How do you rate the availability of equipment in the health facility?</i>                                                              | 2.07, 1.03<br>(2) | 2.16, 1.02<br>(2) | 1.81, 1.03<br>(1.5) | 452 |
|                         | <i>How do you rate the availability of medical supplies in the health facility?</i>                                                       | 2.44, 1.16<br>(2) | 2.64, 1.18<br>(2) | 1.88, 0.90<br>(2)   | 453 |
| Income reflects effort  | <i>The effort that we at this facility put into this job is reflected in our pay</i>                                                      | 2.20, 1.02<br>(2) | 2.37, 1.08<br>(2) | 1.74, 0.59<br>(2)   | 451 |
|                         | <i>My job offers adequate pay compared with similar jobs</i>                                                                              | 2.09, 0.93<br>(2) | 2.24, 0.99<br>(2) | 1.64, 0.55<br>(2)   | 451 |
|                         | <i>The income I receive is a fair reflection of my skills, knowledge and training</i>                                                     | 1.80, 0.71<br>(2) | 1.89, 0.73<br>(2) | 1.54, 0.56<br>(2)   | 448 |
| Sufficiency of income   | <i>The income that I receive from working at this facility more than covers my basic needs such as food, transport, and accommodation</i> | 1.71, 0.65<br>(2) | 1.79, 0.67<br>(2) | 1.47, 0.55<br>(1)   | 448 |
| Organizational culture  | <i>How do you rate your working relationships with upper-level staff?</i>                                                                 | 3.93, 0.73<br>(4) | 3.96, 0.75<br>(4) | 3.84, 0.68<br>(4)   | 453 |
|                         | <i>How do you rate your working relationship with colleagues?</i>                                                                         | 4.09, 0.66<br>(4) | 4.15, 0.63<br>(4) | 3.92, 0.71<br>(4)   | 453 |
|                         | <i>How do you rate the transparency of the management of financial resources by the facility?</i>                                         | 3.49, 1.04<br>(4) | 3.49, 1.07<br>(4) | 3.48, 0.98<br>(4)   | 452 |
|                         | <i>How do you rate your participation in decision-making to resolve problems in the facility?</i>                                         | 3.80, 0.76<br>(4) | 3.85, 0.76<br>(4) | 3.65, 0.73<br>(4)   | 453 |
| Community relationships | <i>How do you rate your relationship with local leaders in the community</i>                                                              | 4.00, 0.72<br>(4) | 4.04, 0.74<br>(4) | 3.91, 0.64 (4)      | 451 |
| Turnover intention      | <i>I intend to leave this facility as soon as I can find another position</i>                                                             | 3.00, 1.25<br>(4) | 3.07, 1.21<br>(4) | 2.82, 1.34 (3)      | 449 |
| Extrinsic motivation    | <i>I only do this job so that I get paid at the end of the month</i>                                                                      | 3.62, 1.07<br>(4) | 3.50, 1.07<br>(4) | 3.95, 0.99 (4)      | 451 |
